# Supplementary material for: Differences over 12 Years in Food Portion Size and Association with Excess Body Weight in the City of São Paulo, Brazil
Source: PubMed Central journal article supplement (PMC6024366; doi:10.3390/nu10060696), 2018-05-30
Supplement: nutrients-10-00696-s001.pdf [file nutrients-10-00696-s001.pdf]

**Table S1.** List of foods that were included in each food grouping.

| Food groupings       | Description of food group contents                                                     |
|----------------------|----------------------------------------------------------------------------------------|
| Alcoholic beverages  | Fermented and distilled alcoholic beverages                                            |
| Beans                | Black and brown beans                                                                  |
| Breads and rolls     | White and brown bread and rolls                                                        |
| Butter and margarine | Butter and margarine                                                                   |
| Cakes                | Cakes with or without topping and filling                                              |
| Cheese               | Cheeses, all types                                                                     |
| Coffee and tea       | Coffee and tea, caffeinated or decaffeinated                                           |
| Cold Cuts            | Ham, salami, roast beef, turkey ham                                                    |
| Commercial juices    | Ready-to-drink juices, powder juices, nectar, etc. With or without sugar               |
| Eggs                 | Boiled, fries, scrambled eggs                                                          |
| Flavored powder      | Artificially flavored powders: chocolate, strawberry, etc.                             |
| Flavored Snacks      | Potato chips, flavored snacks                                                          |
| Fried Snacks         | French fries, onion rings, fried cornmeal mush                                         |
| Fruits               | Banana, apple, papaya, melon, mango, citrus fruit, etc.                                |
| Fruit juices         | Lemonade, pineapple, orange, passion fruit juices, etc. With or without sugar          |
| Leafy vegetables     | Lettuce, cabbage, escarole, kale, etc.                                                 |
| Milk                 | Whole, lowfat, skimmed and fortified milks                                             |
| Pasta                | Spaghetti, ravioli, noodles, cannelloni, lasagna, etc. With or without sauce           |
| Pizza                | Sweet (e.g., chocolate) or salt (e.g., mozzarella) pizza                               |
| Red meat             | Beef, hamburger, liver, ribs, jerked beef, lamb, pork, etc.                            |
| Rice                 | White and brown rice                                                                   |
| Salted snacks        | Fried or baked savory snacks, e.g., "esfiha", "coxinha", croissant, cheese bread, etc. |
| Sandwiches           | Hamburger, cheeseburger, cold cut sandwiches, etc.                                     |
| Soft drinks          | Fruit-flavored drinks, cola and noncola soft drinks, light and diet soft drinks        |
| Soups                | Soups and creams, including with vegetables or pasta                                   |
| Sugar                | Added sugar, white or brown                                                            |
| Sweets               | Chocolate, puddings, ice creams, sweet rolls and pies, etc.                            |
| Toast and biscuits   | White and brown toasts, savory or sweet biscuits and crackers, with or without filling |
| Tubers and roots     | Potato, cassava, yams, sweet potato                                                    |
| Vegetables           | Carrots, tomato, eggplant, broccoli, cucumber, radish, etc.                            |
| White meat           | Chicken, turkey, fish and seafood                                                      |

**Table S2.** Frequency of consumption and portion size of food groupings for adolescents of the ISA-Nutrition in 2003, 2008 and 2015.

| Food Grouping <sup>a</sup> | Total Adolescents (n = 1711) |      |                  |        |                |                              |      |                  |        |                |
|----------------------------|------------------------------|------|------------------|--------|----------------|------------------------------|------|------------------|--------|----------------|
|                            | ISA-Nutrition 2003 (n = 677) |      |                  |        |                | ISA-Nutrition 2008 (n = 512) |      |                  |        |                |
|                            | Consumption                  |      | Portion size (g) |        |                | Consumption                  |      | Portion size (g) |        |                |
|                            | %                            | SE   | mean             | median | IQR            | %                            | SE   | mean             | median | IQR            |
| Alcoholic beverages        | 3.3                          | 0.01 | 864.4            | 582.9  | .              | 4.3                          | 0.01 | 985.2            | 703.0  | .              |
| Beans                      | 65.1                         | 0.03 | 118.2            | 86.0   | (112.2, 124.3) | 63.6                         | 0.03 | 120.0            | 86.0   | (113.5, 126.6) |
| Breads and rolls           | 74.8                         | 0.02 | 71.4             | 50.0   | (67.9, 75.0)   | 68.2                         | 0.02 | 76.1             | 60.0   | (71.4, 80.7)   |
| Butter and margarine       | 50.3                         | 0.03 | 22.1             | 15.0   | (18.6, 25.6)   | 40.4                         | 0.02 | 24.1             | 22.5   | (21.9, 26.3)   |
| Cakes                      | 13.2                         | 0.02 | 94.1             | 72.0   | (82.5, 105.7)  | 14.3                         | 0.02 | 104.2            | 90.0   | (79.9, 128.5)  |
| Cheese                     | 23.6                         | 0.02 | 34.7             | 30.0   | (30.6, 38.9)   | 21.9                         | 0.02 | 39.5             | 27.0   | (33.4, 45.6)   |
| Coffee and tea             | 49.8                         | 0.03 | 125.5            | 120.1  | (112.9, 138.2) | 42.3                         | 0.03 | 130.8            | 120.1  | (119.3, 142.3) |
| Cold Cuts                  | 14.6                         | 0.01 | 37.2             | 30.0   | (29.3, 45.2)   | 18.4                         | 0.02 | 36.5             | 30.0   | (30.8, 42.1)   |
| Commercial juices          | 22.1                         | 0.02 | 330.1            | 308.6  | (303.9, 356.3) | 35.2                         | 0.02 | 322.4            | 252.6  | (297.1, 347.7) |
| Eggs                       | 11.1                         | 0.01 | 55.8             | 50.0   | (48.2, 63.3)   | 6.8                          | 0.01 | 59.9             | 50.0   | (50.1, 69.6)   |
| Flavored powder            | 26.9                         | 0.02 | 28.2             | 25.0   | (24.8, 31.5)   | 25.8                         | 0.02 | 27.6             | 27.5   | (24.9, 30.4)   |
| Flavored Snacks            | 5.0                          | 0.01 | 68.9             | 55.0   | (47.9, 89.9)   | 9.0                          | 0.01 | 85.9             | 66.0   | (70.3, 101.6)  |
| Fried snacks               | 7.3                          | 0.01 | 111.6            | 100.0  | (91.4, 131.7)  | 8.8                          | 0.01 | 150.0            | 106.4  | (100.5, 199.6) |
| Fruit juices               | 24.0                         | 0.02 | 298.1            | 251.6  | (277.8, 318.3) | 19.7                         | 0.02 | 296.4            | 251.6  | (270.3, 322.4) |
| Fruits                     | 20.6                         | 0.02 | 192.3            | 150.0  | (163.7, 220.9) | 19.7                         | 0.02 | 149.9            | 135.0  | (131.0, 168.8) |
| Leafy Vegetables           | 30.5                         | 0.02 | 35.2             | 30.0   | (31.6, 38.7)   | 29.2                         | 0.02 | 36.2             | 30.0   | (31.6, 40.8)   |
| Milk                       | 59.5                         | 0.03 | 201.9            | 198.0  | (188.3, 215.4) | 54.3                         | 0.02 | 213.3            | 198.0  | (197.6, 228.9) |
| Pasta                      | 22.3                         | 0.02 | 237.8            | 225.0  | (208.9, 266.7) | 20.8                         | 0.02 | 218.3            | 208.8  | (195.6, 241.0) |
| Pizza                      | 6.3                          | 0.01 | 296.6            | 286.5  | (228.1, 365.2) | 9.5                          | 0.02 | 282.2            | 200.3  | (179.5, 385.0) |
| Red meat                   | 54.5                         | 0.03 | 104.8            | 100.0  | (98.0, 111.5)  | 61.8                         | 0.02 | 126.4            | 100.0  | (108.8, 144.0) |
| Rice                       | 78.5                         | 0.02 | 169.1            | 150.0  | (155.1, 183.0) | 76.6                         | 0.02 | 162.7            | 135.0  | (153.9, 171.5) |
| Salted snacks              | 26.3                         | 0.02 | 108.1            | 72.0   | (89.8, 126.3)  | 22.9                         | 0.02 | 126.6            | 94.0   | (105.2, 148.0) |
| Sandwiches                 | 6.5                          | 0.01 | 199.4            | 200.0  | .              | 8.9                          | 0.01 | 186.1            | 186.0  | .              |
| Soft drinks                | 44.1                         | 0.03 | 345.1            | 311.4  | (320.5, 369.6) | 57.6                         | 0.03 | 367.9            | 307.2  | (342.1, 393.8) |
| Soups                      | 7.5                          | 0.02 | 418.4            | 330.0  | .              | 1.5                          | 0.01 | 629.0            | 702.4  | .              |
| Sugar                      | 53.4                         | 0.02 | 12.7             | 10.0   | (11.1, 14.3)   | 55.2                         | 0.03 | 12.7             | 12.0   | (11.6, 13.8)   |

|                    |      |      |       |      |                |      |      |       |      |               |
|--------------------|------|------|-------|------|----------------|------|------|-------|------|---------------|
| Sweets             | 28.5 | 0.02 | 82.7  | 56.2 | (69.6, 95.8)   | 37.0 | 0.03 | 91.7  | 61.1 | (77.9, 105.6) |
| Toast and Biscuits | 27.4 | 0.02 | 72.4  | 54.0 | (64.3, 80.4)   | 31.2 | 0.02 | 82.4  | 52.7 | (71.6, 93.2)  |
| Tubers and roots   | 14.0 | 0.02 | 145.1 | 90.0 | (103.2, 187.0) | 11.9 | 0.01 | 128.5 | 90.0 | (86.8, 170.3) |
| Vegetables         | 32.5 | 0.02 | 59.2  | 45.0 | (51.8, 66.7)   | 26.9 | 0.02 | 68.2  | 50.0 | (58.7, 77.7)  |
| White meat         | 32.0 | 0.02 | 87.9  | 75.0 | (75.7, 100.0)  | 30.2 | 0.02 | 110.7 | 90.0 | (94.7, 126.7) |

Abbreviations: SE, Standard Error; IQR, Interquartile Range. <sup>a</sup>The list of foods included in each food grouping is described in Table S1. <sup>b</sup>Trend was estimated using logistic and linear regression models. Note: missing standard errors because of stratum with single sampling unit.

**Table S2. (Cont.)** Frequency of consumption and portion size of food groupings for adolescents of the ISA-Nutrition in 2003, 2008 and 2015.

| Total Adolescents (n = 1711) |             |      |                      |        |                |                       |            |
|------------------------------|-------------|------|----------------------|--------|----------------|-----------------------|------------|
| ISA-Nutrition 2015 (n = 522) |             |      |                      |        |                |                       |            |
| Food Grouping <sup>a</sup>   | Consumption |      | Portion size (grams) |        |                | <i>p</i> <sup>b</sup> |            |
|                              | %           | SE   | mean                 | median | IQR            | trend portion         | trend freq |
| Alcoholic beverages          | 2.0         | 0.01 | 687.5                | 564.0  | .              | .                     | 0.198      |
| Beans                        | 70.8        | 0.02 | 115.0                | 106.0  | (107.7, 122.2) | 0.487                 | 0.139      |
| Breads and rolls             | 70.2        | 0.02 | 66.8                 | 50.0   | (62.8, 70.8)   | 0.101                 | 0.119      |
| Butter and margarine         | 44.9        | 0.02 | 19.3                 | 15.0   | (16.8, 21.8)   | 0.223                 | 0.154      |
| Cakes                        | 12.6        | 0.02 | 86.8                 | 60.0   | (69.6, 104.5)  | 0.507                 | 0.765      |
| Cheese                       | 20.6        | 0.02 | 33.8                 | 22.5   | (28.3, 39.2)   | 0.835                 | 0.312      |
| Coffee and tea               | 40.1        | 0.02 | 143.4                | 130.6  | (130.2, 156.7) | 0.058                 | 0.008      |
| Cold Cuts                    | 15.2        | 0.02 | 27.6                 | 20.0   | (22.6, 32.6)   | 0.043                 | 0.812      |
| Commercial juices            | 43.1        | 0.02 | 287.6                | 240.0  | (263.7, 311.4) | 0.012                 | 0.000      |
| Eggs                         | 13.1        | 0.02 | 70.6                 | 50.0   | (57.8, 83.5)   | 0.050                 | 0.373      |
| Flavored powder              | 26.8        | 0.02 | 31.0                 | 25.0   | (25.0, 37.0)   | 0.427                 | 0.984      |
| Flavored Snacks              | 9.5         | 0.02 | 59.5                 | 48.0   | (43.2, 75.9)   | 0.292                 | 0.015      |
| Fried snacks                 | 6.5         | 0.01 | 128.3                | 100.0  | (96.6, 160.0)  | 0.347                 | 0.618      |
| Fruit juices                 | 17.7        | 0.02 | 287.0                | 251.6  | (258.9, 315.1) | 0.539                 | 0.034      |
| Fruits                       | 31.6        | 0.02 | 154.0                | 131.0  | (134.1, 173.9) | 0.041                 | 0.001      |
| Leafy Vegetables             | 29.4        | 0.02 | 35.7                 | 30.0   | (30.4, 40.9)   | 0.882                 | 0.755      |
| Milk                         | 51.8        | 0.03 | 206.6                | 198.0  | (193.2, 219.9) | 0.595                 | 0.048      |
| Pasta                        | 21.1        | 0.02 | 207.4                | 208.8  | (181.7, 233.2) | 0.125                 | 0.717      |
| Pizza                        | 5.8         | 0.01 | 259.2                | 181.0  | (209.6, 308.7) | 0.385                 | 0.777      |

|                    |      |      |       |       |                |       |       |
|--------------------|------|------|-------|-------|----------------|-------|-------|
| Red meat           | 63.8 | 0.02 | 97.8  | 90.0  | (89.3, 106.4)  | 0.139 | 0.012 |
| Rice               | 87.1 | 0.02 | 144.7 | 125.0 | (135.4, 153.9) | 0.004 | 0.006 |
| Salted snacks      | 20.1 | 0.02 | 121.0 | 89.9  | (100.5, 141.4) | 0.311 | 0.035 |
| Sandwiches         | 3.3  | 0.01 | 200.1 | 228.0 | .              | .     | .     |
| Soft drinks        | 40.2 | 0.03 | 337.8 | 311.0 | (309.7, 365.9) | 0.743 | 0.289 |
| Soups              | 2.8  | 0.01 | 383.2 | 390.0 | .              | .     | .     |
| Sugar              | 44.6 | 0.02 | 11.8  | 9.0   | (9.99, 13.6)   | 0.506 | 0.011 |
| Sweets             | 45.5 | 0.03 | 66.8  | 38.0  | (53.9, 79.6)   | 0.052 | 0.000 |
| Toast and Biscuits | 34.5 | 0.02 | 77.4  | 50.0  | (64.3, 90.5)   | 0.580 | 0.014 |
| Tubers and roots   | 14.7 | 0.02 | 96.2  | 70.0  | (73.5, 118.9)  | 0.043 | 0.809 |
| Vegetables         | 33.6 | 0.02 | 63.5  | 50.0  | (54.9, 72.0)   | 0.474 | 0.732 |
| White meat         | 35.6 | 0.02 | 100.5 | 98.0  | (90.6, 110.4)  | 0.136 | 0.267 |

Abbreviations: SE, Standard Error; IQR, Interquartile Range. <sup>a</sup> The list of foods included in each food grouping is described in Table S1. <sup>b</sup> Trend was estimated using logistic and linear regression models. Note: missing standard errors because of stratum with single sampling unit.

**Table S3.** Frequency of consumption and portion size of food groupings for adults of the ISA-Nutrition in 2003, 2008 and 2015.

| Food Grouping <sup>a</sup> | Total Adults (n = 1865)      |      |        |                  |                |                              |      |        |                  |                |
|----------------------------|------------------------------|------|--------|------------------|----------------|------------------------------|------|--------|------------------|----------------|
|                            | ISA-Nutrition 2003 (n = 692) |      |        |                  |                | ISA-Nutrition 2008 (n = 560) |      |        |                  |                |
|                            | Consumption %                | SE   | mean   | Portion size (g) |                | Consumption %                | SE   | mean   | Portion size (g) |                |
|                            |                              |      | median | IQR              |                |                              |      | median | IQR              |                |
| Alcoholic beverages        | 11.1                         | 0.01 | 762.4  | 602.6            | (610.1, 914.7) | 13.2                         | 0.02 | 735.6  | 500.6            | (577.9, 893.3) |
| Beans                      | 62.9                         | 0.02 | 104.1  | 86.0             | (96.9, 111.2)  | 66.3                         | 0.03 | 108.9  | 86.0             | (100.9, 116.9) |
| Breads and rolls           | 70.0                         | 0.02 | 61.6   | 50.0             | (58.4, 64.8)   | 70.4                         | 0.02 | 62.1   | 50.0             | (58.7, 65.6)   |
| Butter and margarine       | 46.9                         | 0.02 | 15.2   | 15.0             | (13.3, 17.0)   | 40.9                         | 0.02 | 16.8   | 15.0             | (14.6, 19.0)   |
| Cakes                      | 10.6                         | 0.01 | 91.4   | 60.2             | (72.1, 110.7)  | 10.0                         | 0.01 | 85.5   | 70.0             | (71.2, 99.8)   |
| Cheese                     | 25.3                         | 0.02 | 38.6   | 33.3             | (34.3, 42.8)   | 25.8                         | 0.02 | 37.6   | 30.0             | (32.4, 42.8)   |
| Coffee and tea             | 79.1                         | 0.02 | 117.3  | 96.1             | (111.0, 123.6) | 75.8                         | 0.02 | 115.8  | 96.1             | (106.1, 125.5) |
| Cold Cuts                  | 11.5                         | 0.01 | 41.9   | 30.0             | (34.3, 49.6)   | 16.5                         | 0.02 | 32.5   | 30.0             | (25.7, 39.3)   |
| Commercial juices          | 17.5                         | 0.01 | 306.1  | 257.1            | (278.9, 333.3) | 23.6                         | 0.02 | 281.5  | 240.0            | (258.2, 304.8) |
| Eggs                       | 9.1                          | 0.01 | 57.1   | 50.0             | (52.0, 62.1)   | 11.6                         | 0.02 | 47.6   | 50.0             | (37.9, 57.3)   |
| Flavored powder            | 9.8                          | 0.01 | 31.0   | 25.0             | (26.2, 35.8)   | 8.9                          | 0.02 | 27.7   | 22.0             | (20.1, 35.3)   |
| Fried snacks               | 5.8                          | 0.01 | 119.7  | 102.0            | (97.4, 142.0)  | 5.5                          | 0.01 | 151.1  | 130.0            | (114.3, 187.9) |
| Fruit juices               | 21.0                         | 0.02 | 516.9  | 251.6            | (102.8, 931.0) | 21.5                         | 0.02 | 259.7  | 240.4            | (234.4, 285.0) |
| Fruits                     | 26.3                         | 0.02 | 151.1  | 130.0            | (137.0, 165.2) | 34.6                         | 0.03 | 172.0  | 140.0            | (151.5, 192.5) |
| Leafy Vegetables           | 41.0                         | 0.02 | 40.4   | 30.0             | (35.3, 45.5)   | 43.0                         | 0.02 | 43.0   | 32.0             | (37.4, 48.6)   |
| Milk                       | 61.7                         | 0.02 | 165.7  | 136.1            | (155.5, 175.9) | 55.7                         | 0.03 | 150.2  | 123.8            | (139.1, 161.2) |
| Pasta                      | 19.6                         | 0.02 | 237.6  | 245.0            | (212.9, 262.4) | 19.6                         | 0.02 | 219.2  | 208.8            | (198.4, 239.9) |
| Pizza                      | 8.1                          | 0.01 | 300.1  | 286.4            | (249.7, 350.6) | 8.1                          | 0.01 | 209.6  | 200.3            | (180.9, 238.2) |
| Red meat                   | 58.9                         | 0.02 | 117.2  | 100.0            | (110.6, 123.7) | 59.9                         | 0.02 | 116.2  | 100.0            | (104.0, 128.5) |
| Rice                       | 78.1                         | 0.02 | 163.4  | 132.5            | (153.6, 173.1) | 82.5                         | 0.02 | 142.3  | 124.0            | (131.5, 153.1) |
| Salted snacks              | 16.9                         | 0.01 | 95.7   | 71.3             | (78.5, 112.9)  | 15.6                         | 0.02 | 90.3   | 60.0             | (67.0, 113.6)  |
| Sandwiches                 | 4.4                          | 0.01 | 234.3  | 202.0            | (194.8, 273.8) | 4.3                          | 0.01 | 157.5  | 124.9            | (106.6, 208.4) |
| Snacks                     | 2.1                          | 0.01 | 81.0   | 40.0             | .              | 1.8                          | 0.01 | 52.8   | 24.0             | .              |
| Soft drinks                | 32.7                         | 0.02 | 346.5  | 311.4            | (318.6, 374.4) | 35.5                         | 0.02 | 313.0  | 250.0            | (287.9, 338.1) |
| Soups                      | 9.4                          | 0.02 | 431.4  | 319.0            | (344.3, 518.6) | 3.8                          | 0.01 | 385.9  | 300.0            | (256.7, 515.1) |
| Sugar                      | 58.7                         | 0.03 | 9.8    | 7.2              | (8.83, 10.7)   | 68.6                         | 0.03 | 9.4    | 7.8              | (8.55, 10.2)   |
| Sweets                     | 19.7                         | 0.02 | 90.3   | 69.7             | (81.1, 99.5)   | 28.7                         | 0.02 | 82.2   | 52.5             | (70.5, 93.9)   |

|                    |      |      |       |      |               |      |      |       |       |                |
|--------------------|------|------|-------|------|---------------|------|------|-------|-------|----------------|
| Toast and Biscuits | 22.6 | 0.02 | 43.4  | 32.0 | (36.8, 50.0)  | 25.4 | 0.02 | 39.0  | 30.0  | (32.1, 45.9)   |
| Tubers and roots   | 13.7 | 0.01 | 112.4 | 90.0 | (90.5, 134.3) | 16.8 | 0.02 | 139.6 | 80.0  | (81.8, 197.4)  |
| Vegetables         | 45.2 | 0.02 | 78.6  | 60.0 | (69.9, 87.4)  | 47.2 | 0.03 | 80.8  | 54.3  | (63.9, 97.7)   |
| White meat         | 33.6 | 0.02 | 101.7 | 80.0 | (92.0, 111.4) | 41.0 | 0.02 | 121.7 | 100.0 | (104.5, 139.0) |

Abbreviations: SE, Standard Error; IQR, Interquartile Range. <sup>a</sup>The list of foods included in each food grouping is described in Table S1. <sup>b</sup>Trend was estimated using logistic and linear regression models. Note: missing standard errors because of stratum with single sampling unit.

**Table S3. (Cont.)** Frequency of consumption and portion size of food groupings for adults of the ISA-Nutrition in 2003, 2008 and 2015.

| Total Adults (n = 1865)      |             |      |                  |        |                |                       |       |            |
|------------------------------|-------------|------|------------------|--------|----------------|-----------------------|-------|------------|
| ISA-Nutrition 2015 (n = 613) |             |      |                  |        |                |                       |       |            |
| Food Grouping <sup>a</sup>   | Consumption |      | Portion size (g) |        |                | <i>p</i> <sup>b</sup> |       | trend freq |
|                              | %           | SE   | mean             | median | IQR            | trend portion         |       |            |
| Alcoholic beverages          | 14.5        | 0.02 | 739.6            | 351.5  | (530.7, 948.6) | 0.853                 | 0.113 |            |
| Beans                        | 66.1        | 0.03 | 111.2            | 86.0   | (104.0, 118.4) | 0.160                 | 0.313 |            |
| Breads and rolls             | 74.1        | 0.02 | 60.4             | 50.0   | (57.4, 63.4)   | 0.638                 | 0.140 |            |
| Butter and margarine         | 48.1        | 0.02 | 17.4             | 15.0   | (16.0, 18.7)   | 0.052                 | 0.942 |            |
| Cakes                        | 13.7        | 0.02 | 94.8             | 70.0   | (73.2, 116.4)  | 0.845                 | 0.190 |            |
| Cheese                       | 25.5        | 0.02 | 37.8             | 30.0   | (33.1, 42.5)   | 0.790                 | 0.924 |            |
| Coffee and tea               | 76.5        | 0.02 | 154.4            | 133.1  | (140.3, 168.6) | 0.000                 | 0.276 |            |
| Cold Cuts                    | 12.9        | 0.01 | 30.7             | 20.0   | (23.6, 37.8)   | 0.030                 | 0.283 |            |
| Commercial juices            | 28.5        | 0.02 | 296.0            | 240.0  | (260.6, 331.3) | 0.648                 | 0.000 |            |
| Eggs                         | 12.2        | 0.02 | 74.9             | 50.0   | (62.2, 87.6)   | 0.016                 | 0.101 |            |
| Flavored powder              | 8.5         | 0.01 | 24.2             | 22.0   | (20.7, 27.7)   | 0.035                 | 0.446 |            |
| Fried snacks                 | 4.9         | 0.01 | 103.5            | 100.0  | (84.5, 122.4)  | 0.619                 | 0.578 |            |
| Fruit juices                 | 23.4        | 0.02 | 309.3            | 251.6  | (281.6, 337.0) | 0.310                 | 0.401 |            |
| Fruits                       | 42.7        | 0.02 | 157.2            | 130.0  | (142.4, 172.0) | 0.546                 | 0.000 |            |
| Leafy Vegetables             | 44.0        | 0.02 | 37.5             | 30.0   | (33.4, 41.7)   | 0.504                 | 0.384 |            |
| Milk                         | 56.9        | 0.03 | 158.7            | 148.5  | (148.2, 169.2) | 0.229                 | 0.094 |            |
| Pasta                        | 19.8        | 0.02 | 192.9            | 165.0  | (152.3, 233.4) | 0.060                 | 0.946 |            |
| Pizza                        | 8.5         | 0.01 | 282.1            | 295.2  | (236.9, 327.2) | 0.389                 | 0.848 |            |
| Red meat                     | 58.2        | 0.02 | 109.3            | 100.0  | (100.2, 118.3) | 0.187                 | 0.884 |            |
| Rice                         | 80.6        | 0.02 | 155.9            | 132.5  | (145.7, 166.1) | 0.164                 | 0.319 |            |

|                    |      |      |       |       |                |       |       |
|--------------------|------|------|-------|-------|----------------|-------|-------|
| Salted snacks      | 16.8 | 0.02 | 125.5 | 119.8 | (107.3, 143.8) | 0.039 | 0.924 |
| Sandwiches         | 4.1  | 0.01 | 163.3 | 158.0 | (127.8, 198.7) | 0.009 | 0.815 |
| Snacks             | 2.6  | 0.01 | 61.7  | 50.0  | .              | .     | .     |
| Soft drinks        | 32.6 | 0.02 | 335.1 | 290.0 | (306.7, 363.4) | 0.433 | 0.918 |
| Soups              | 7.2  | 0.01 | 382.0 | 389.7 | (309.3, 454.8) | 0.376 | 0.227 |
| Sugar              | 60.8 | 0.03 | 11.1  | 8.6   | (9.86, 12.4)   | 0.133 | 0.376 |
| Sweets             | 32.7 | 0.02 | 71.5  | 47.5  | (58.7, 84.3)   | 0.020 | 0.000 |
| Toast and Biscuits | 26.3 | 0.02 | 52.2  | 30.0  | (43.0, 61.4)   | 0.170 | 0.129 |
| Tubers and roots   | 15.4 | 0.02 | 145.5 | 88.7  | (111.3, 179.7) | 0.093 | 0.352 |
| Vegetables         | 48.5 | 0.03 | 72.8  | 54.6  | (64.0, 81.7)   | 0.429 | 0.283 |
| White meat         | 38.3 | 0.02 | 118.2 | 100.0 | (107.7, 128.7) | 0.016 | 0.073 |

Abbreviations: SE, Standard Error; IQR, Interquartile Range. <sup>a</sup>The list of foods included in each food grouping is described in Table S1. <sup>b</sup>Trend was estimated using logistic and linear regression models. Note: missing standard errors because of stratum with single sampling unit.

**Table S4.** Frequency of consumption and portion size of food groupings for older adults of the ISA-Nutrition in 2003, 2008 and 2015.

| Food Grouping <sup>a</sup> | Total Older Adults (n = 1143) |      |        |                  |                |                              |      |        |                  |                |
|----------------------------|-------------------------------|------|--------|------------------|----------------|------------------------------|------|--------|------------------|----------------|
|                            | ISA-Nutrition 2003 (n = 456)  |      |        |                  |                | ISA-Nutrition 2008 (n = 321) |      |        |                  |                |
|                            | Consumption %                 | SE   | mean   | Portion size (g) |                | Consumption %                | SE   | mean   | Portion size (g) |                |
|                            |                               |      | median | IQR              |                |                              |      | median | IQR              |                |
| Alcoholic beverages        | 7.5                           | 0.01 | 401.6  | 301.3            | (272.9, 530.3) | 6.5                          | 0.01 | 317.2  | 351.5            | (243.3, 391.0) |
| Beans                      | 63.0                          | 0.02 | 85.6   | 81.9             | (78.9, 92.2)   | 67.3                         | 0.03 | 87.1   | 86.0             | (81.1, 93.0)   |
| Breads and rolls           | 74.8                          | 0.02 | 50.6   | 50.0             | (48.6, 52.6)   | 78.1                         | 0.02 | 51.5   | 50.0             | (48.8, 54.2)   |
| Butter and margarine       | 44.2                          | 0.02 | 13.2   | 7.5              | (12.1, 14.3)   | 46.0                         | 0.02 | 15.7   | 15.0             | (14.2, 17.1)   |
| Cakes                      | 5.8                           | 0.01 | 83.8   | 60.2             | (65.9, 101.7)  | 9.6                          | 0.02 | 73.2   | 60.0             | (60.6, 85.7)   |
| Cheese                     | 30.0                          | 0.02 | 37.7   | 30.0             | (32.9, 42.4)   | 30.4                         | 0.02 | 36.4   | 30.0             | (31.8, 41.0)   |
| Coffee and tea             | 91.7                          | 0.01 | 113.2  | 96.1             | (105.8, 120.7) | 88.4                         | 0.01 | 108.7  | 96.1             | (103.6, 113.9) |
| Cold Cuts                  | 7.8                           | 0.01 | 31.8   | 30.0             | (25.7, 38.0)   | 10.8                         | 0.02 | 36.3   | 30.0             | (25.2, 47.5)   |
| Commercial juices          | 7.5                           | 0.01 | 319.4  | 240.3            | (131.2, 507.7) | 15.3                         | 0.02 | 225.9  | 240.0            | (192.8, 258.9) |
| Eggs                       | 8.5                           | 0.01 | 54.4   | 50.0             | (48.2, 60.6)   | 11.8                         | 0.01 | 46.8   | 50.0             | (38.5, 55.0)   |
| Flavored powder            | 4.1                           | 0.01 | 41.0   | 25.0             | (19.2, 62.8)   | 4.6                          | 0.01 | 19.6   | 12.5             | (9.68, 29.5)   |
| Fried snacks               | 2.8                           | 0.01 | 114.5  | 100.0            | (82.7, 146.4)  | 3.2                          | 0.01 | 81.4   | 50.0             | (41.4, 121.5)  |
| Fruit juices               | 14.8                          | 0.01 | 227.1  | 240.4            | (206.1, 248.0) | 13.9                         | 0.02 | 260.0  | 240.3            | (210.3, 309.6) |

|                    |      |      |       |       |                |      |      |       |       |                |
|--------------------|------|------|-------|-------|----------------|------|------|-------|-------|----------------|
| Fruits             | 54.4 | 0.03 | 181.4 | 155.0 | (166.2, 196.5) | 58.4 | 0.03 | 187.6 | 158.2 | (170.2, 205.0) |
| Leafy Vegetables   | 49.4 | 0.02 | 45.7  | 35.0  | (39.8, 51.5)   | 47.9 | 0.02 | 42.0  | 35.0  | (36.7, 47.3)   |
| Milk               | 72.9 | 0.02 | 156.5 | 140.3 | (147.5, 165.5) | 79.1 | 0.02 | 141.2 | 124.3 | (133.7, 148.7) |
| Pasta              | 18.0 | 0.02 | 244.6 | 199.8 | (187.4, 301.8) | 14.9 | 0.02 | 178.6 | 135.0 | (140.4, 216.7) |
| Pizza              | 3.1  | 0.01 | 301.1 | 286.5 | .              | 2.6  | 0.01 | 167.4 | 113.2 | .              |
| Red meat           | 50.8 | 0.02 | 93.3  | 90.0  | (87.5, 99.1)   | 56.8 | 0.02 | 95.2  | 80.0  | (83.1, 107.3)  |
| Rice               | 79.2 | 0.03 | 135.1 | 106.0 | (127.3, 142.9) | 80.4 | 0.03 | 126.7 | 112.5 | (116.6, 136.8) |
| Salted snacks      | 10.5 | 0.02 | 76.6  | 50.0  | (61.8, 91.4)   | 7.9  | 0.02 | 83.8  | 60.0  | (51.0, 116.6)  |
| Sandwiches         | 0.6  | 0.00 | 137.6 | 118.0 | .              | 0.5  | 0.00 | 118.8 | 85.5  | .              |
| Snacks             | 0.6  | 0.00 | 41.6  | 50.0  | .              | 0.6  | 0.00 | 87.7  | 50.0  | .              |
| Soft drinks        | 15.3 | 0.01 | 246.6 | 240.2 | (214.3, 278.8) | 19.4 | 0.02 | 227.5 | 222.2 | (202.9, 252.0) |
| Soups              | 16.0 | 0.02 | 356.0 | 325.0 | (312.0, 400.1) | 15.4 | 0.02 | 383.3 | 325.0 | (320.7, 445.8) |
| Sugar              | 54.3 | 0.02 | 9.0   | 7.5   | (7.97, 9.95)   | 57.8 | 0.02 | 10.2  | 7.8   | (8.75, 11.6)   |
| Sweets             | 15.8 | 0.02 | 81.9  | 60.5  | (65.3, 98.6)   | 17.4 | 0.02 | 68.8  | 50.0  | (54.2, 83.3)   |
| Toast and Biscuits | 27.8 | 0.02 | 28.6  | 24.0  | (26.2, 31.0)   | 25.6 | 0.02 | 26.0  | 24.0  | (23.0, 28.9)   |
| Tubers and roots   | 15.2 | 0.02 | 116.4 | 90.0  | (96.7, 136.2)  | 16.9 | 0.02 | 105.4 | 80.0  | (83.0, 127.7)  |
| Vegetables         | 45.9 | 0.03 | 76.2  | 60.0  | (68.4, 84.0)   | 50.0 | 0.02 | 82.6  | 50.0  | (69.2, 96.0)   |
| White meat         | 31.4 | 0.02 | 101.3 | 80.0  | (90.0, 112.6)  | 31.8 | 0.02 | 94.5  | 80.0  | (83.1, 105.9)  |

Abbreviations: SE, Standard Error; IQR, Interquartile Range. <sup>a</sup>The list of foods included in each food grouping is described in Table S1. <sup>b</sup>Trend was estimated using logistic and linear regression models. Note: missing standard errors because of stratum with single sampling unit.

**Table S4. (Cont.)** Frequency of consumption and portion size of food groupings for older adults of the ISA-Nutrition in 2003, 2008 and 2015.

| Total Older Adults (n = 1143) |                              |      |                  |        |                |               |                       |  |
|-------------------------------|------------------------------|------|------------------|--------|----------------|---------------|-----------------------|--|
| Food Grouping <sup>a</sup>    | ISA-Nutrition 2015 (n = 366) |      |                  |        |                |               | <i>p</i> <sup>b</sup> |  |
|                               | Consumption                  |      | Portion size (g) |        |                | trend portion | trend freq            |  |
|                               | %                            | SE   | mean             | median | IQR            |               |                       |  |
| Alcoholic beverages           | 10.9                         | 0.01 | 498.2            | 304.0  | (300.4, 695.0) | 0.346         | 0.038                 |  |
| Beans                         | 65.0                         | 0.03 | 89.7             | 79.0   | (83.2, 96.3)   | 0.374         | 0.646                 |  |
| Breads and rolls              | 82.8                         | 0.02 | 49.2             | 50.0   | (46.7, 51.7)   | 0.346         | 0.004                 |  |
| Butter and margarine          | 50.1                         | 0.03 | 15.7             | 15.0   | (14.5, 16.9)   | 0.005         | 0.087                 |  |
| Cakes                         | 9.2                          | 0.01 | 77.2             | 60.0   | (58.7, 95.6)   | 0.715         | 0.090                 |  |



|                    |      |      |       |       |                |       |       |
|--------------------|------|------|-------|-------|----------------|-------|-------|
| Cheese             | 35.2 | 0.03 | 33.1  | 30.0  | (29.9, 36.3)   | 0.104 | 0.144 |
| Coffee and tea     | 92.1 | 0.02 | 123.1 | 101.8 | (114.5, 131.6) | 0.067 | 0.712 |
| Cold Cuts          | 9.1  | 0.02 | 23.8  | 17.0  | (19.2, 28.4)   | 0.019 | 0.575 |
| Commercial juices  | 15.1 | 0.02 | 203.1 | 200.0 | (174.9, 231.3) | 0.193 | 0.001 |
| Eggs               | 10.1 | 0.01 | 55.7  | 50.0  | (47.7, 63.6)   | 0.632 | 0.478 |
| Flavored powder    | 4.6  | 0.01 | 24.3  | 16.0  | (16.1, 32.6)   | 0.177 | 0.746 |
| Fried snacks       | 3.8  | 0.01 | 79.8  | 65.0  | (61.1, 98.6)   | 0.084 | 0.425 |
| Fruit juices       | 18.9 | 0.02 | 221.5 | 211.3 | (195.9, 247.0) | 0.559 | 0.079 |
| Fruits             | 66.0 | 0.03 | 155.1 | 131.4 | (143.2, 166.9) | 0.003 | 0.002 |
| Leafy Vegetables   | 51.1 | 0.03 | 37.3  | 30.0  | (32.9, 41.8)   | 0.025 | 0.599 |
| Milk               | 72.0 | 0.02 | 146.7 | 128.9 | (136.7, 156.7) | 0.201 | 0.622 |
| Pasta              | 16.0 | 0.02 | 169.8 | 150.0 | (145.8, 193.8) | 0.020 | 0.500 |
| Pizza              | 3.3  | 0.01 | 355.4 | 362.6 | .              | .     | .     |
| Red meat           | 55.0 | 0.02 | 94.2  | 80.0  | (87.1, 101.3)  | 0.881 | 0.273 |
| Rice               | 83.1 | 0.02 | 124.8 | 108.5 | (116.3, 133.2) | 0.089 | 0.199 |
| Salted snacks      | 9.1  | 0.01 | 90.5  | 65.0  | (60.4, 120.6)  | 0.420 | 0.600 |
| Sandwiches         | 1.3  | 0.01 | 148.3 | 185.3 | .              | .     | .     |
| Snacks             | 0.6  | 0.00 | 17.9  | 10.0  | .              | .     | 0.922 |
| Soft drinks        | 17.6 | 0.02 | 261.8 | 216.0 | (228.2, 295.4) | 0.424 | 0.339 |
| Soups              | 12.4 | 0.02 | 398.3 | 466.0 | (327.9, 468.7) | 0.319 | 0.241 |
| Sugar              | 52.0 | 0.03 | 9.4   | 8.0   | (8.30, 10.6)   | 0.608 | 0.451 |
| Sweets             | 26.7 | 0.03 | 73.7  | 50.0  | (61.2, 86.1)   | 0.533 | 0.001 |
| Toast and Biscuits | 25.6 | 0.02 | 25.9  | 24.0  | (22.5, 29.4)   | 0.227 | 0.504 |
| Tubers and roots   | 19.7 | 0.02 | 130.2 | 63.9  | (89.9, 170.6)  | 0.488 | 0.069 |
| Vegetables         | 56.4 | 0.03 | 73.3  | 54.0  | (62.9, 83.6)   | 0.557 | 0.010 |
| White meat         | 38.2 | 0.03 | 107.1 | 95.0  | (94.9, 119.3)  | 0.406 | 0.039 |

Abbreviations: SE, Standard Error; IQR, Interquartile Range. <sup>a</sup>The list of foods included in each food grouping is described in Table S1. <sup>b</sup>Trend was estimated using logistic and linear regression models. Note: missing standard errors because of stratum with single sampling unit.
